# Supplementary material
Source: MDPI journal article supplement (https://www.mdpi.com/2073-4433/12/11/1477)
Supplement: s1 [file s1]

# Supplementary Materials: Indoor Air Quality Assessment of Latin America's First Passivhaus Home

Alejandro Moreno-Rangel <sup>1,2,\*</sup>, Filbert Musau <sup>1</sup>, Tim Sharpe <sup>1,3</sup> and Gráinne McGill <sup>1,3</sup>

**Table S1.** Summary of CO<sub>2</sub> levels in both homes. Source: Authors.

| Month     |      | Bedroom -<br>Standard (ppm) | Living room -<br>Standard (ppm) | Bedroom -<br>Passivhaus<br>(ppm) | Living room -<br>Passivhaus<br>(ppm) |
|-----------|------|-----------------------------|---------------------------------|----------------------------------|--------------------------------------|
| January   | Mean | 1,056.60                    | 615.19                          | 625.59                           | 515.78                               |
|           | N    | 8,928                       | 8,928                           | 8,928                            | 8,928                                |
|           | SD   | 511.55                      | 165.12                          | 136.32                           | 110.70                               |
| February  | Mean | 1,018.28                    | 593.89                          | 695.03                           | 573.82                               |
|           | N    | 8,064                       | 8,064                           | 8,064                            | 8,064                                |
|           | SD   | 500.12                      | 145.85                          | 364.75                           | 300.71                               |
| March     | Mean | 967.29                      | 567.32                          | 1,003.05                         | 969.29                               |
|           | N    | 8,928                       | 8,928                           | 8,928                            | 8,928                                |
|           | SD   | 446.84                      | 134.82                          | 747.68                           | 704.63                               |
| April     | Mean | 892.88                      | 526.58                          | 736.08                           | 727.61                               |
|           | N    | 8,628                       | 8,628                           | 8,628                            | 8,628                                |
|           | SD   | 398.33                      | 97.12                           | 457.20                           | 421.00                               |
| May       | Mean | 1,024.33                    | 555.14                          | 682.89                           | 653.69                               |
|           | N    | 8,928                       | 8,928                           | 8,928                            | 8,928                                |
|           | SD   | 429.52                      | 123.45                          | 286.55                           | 248.11                               |
| June      | Mean | 934.02                      | 574.34                          | 520.66                           | 492.08                               |
|           | N    | 8,640                       | 8,640                           | 8,640                            | 8,640                                |
|           | SD   | 417.78                      | 149.13                          | 168.25                           | 124.03                               |
| July      | Mean | 1,042.05                    | 634.89                          | 465.37                           | 506.12                               |
|           | N    | 8,928                       | 8,928                           | 8,928                            | 8,928                                |
|           | SD   | 480.77                      | 168.66                          | 235.07                           | 210.62                               |
| August    | Mean | 1,014.15                    | 604.12                          | 716.60                           | 828.26                               |
|           | N    | 8,928                       | 8,928                           | 8,928                            | 8,928                                |
|           | SD   | 468.02                      | 153.73                          | 602.60                           | 639.49                               |
| September | Mean | 810.11                      | 558.82                          | 598.77                           | 646.43                               |
|           | N    | 8,640                       | 8,640                           | 8,640                            | 8,640                                |
|           | SD   | 451.88                      | 139.41                          | 311.95                           | 289.95                               |
| October   | Mean | 1,010.61                    | 609.33                          | 777.50                           | 426.32                               |
|           | N    | 8,940                       | 8,940                           | 8,940                            | 8,940                                |
|           | SD   | 504.51                      | 149.95                          | 474.35                           | 390.33                               |
| November  | Mean | 1,074.62                    | 654.24                          | 777.91                           | 366.57                               |
|           | N    | 8,640                       | 8,640                           | 8,640                            | 8,640                                |
|           | SD   | 545.84                      | 200.70                          | 487.02                           | 361.56                               |
| December  | Mean | 1,052.18                    | 630.23                          | 781.96                           | 477.67                               |
|           | N    | 8,928                       | 8,928                           | 8,928                            | 8,928                                |
|           | SD   | 552.99                      | 181.96                          | 484.96                           | 375.50                               |
| Total     | Mean | 991.91                      | 593.85                          | 698.92                           | 599.25                               |
|           | N    | 105,120                     | 105,120                         | 105,120                          | 105,120                              |
|           | SD   | 483.75                      | 157.34                          | 453.88                           | 425.09                               |

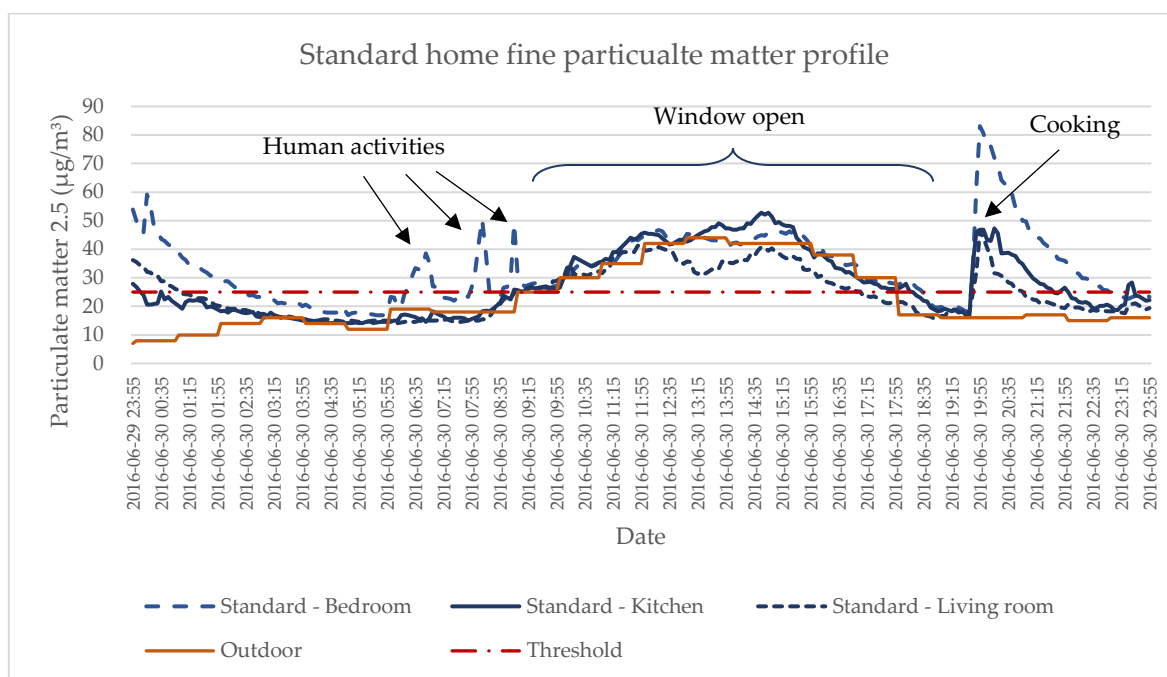

**Figure S1.** Standard home  $\text{PM}_{2.5}$  profile 29–30 June 2016. Source: Authors.

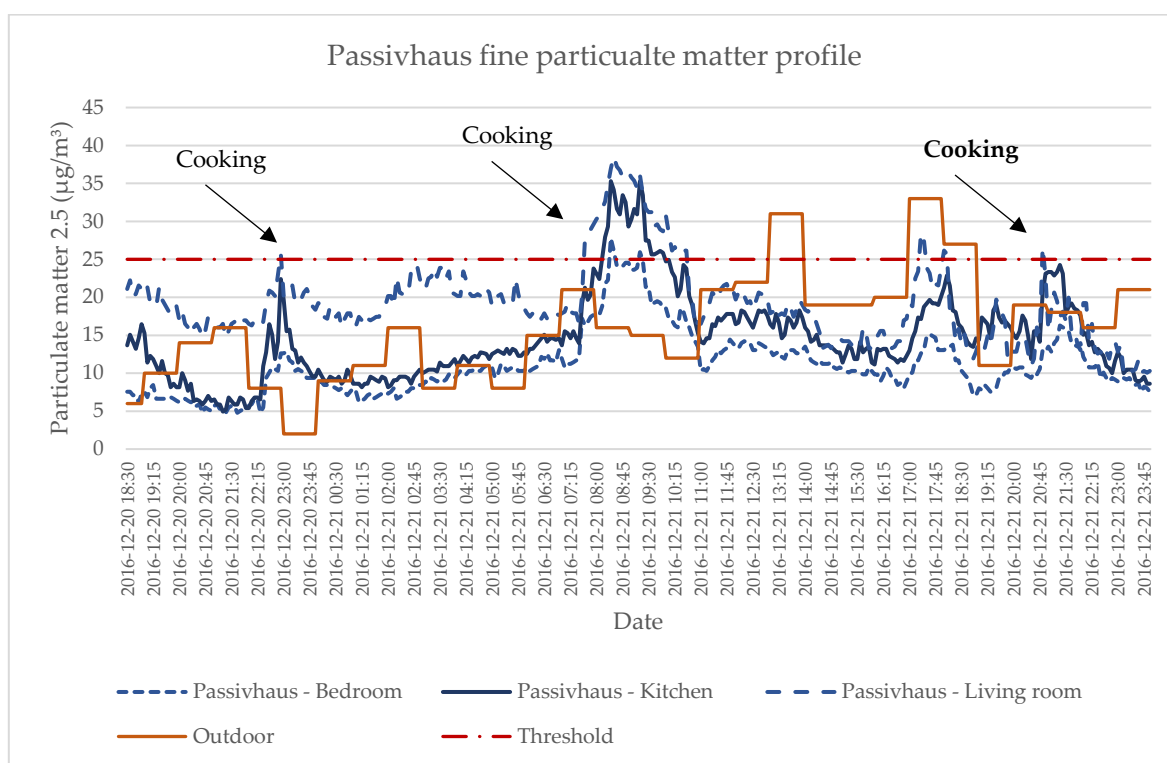

**Figure S2.** Passivhaus home  $\text{PM}_{2.5}$  profile 20–21 December 2016. Source: Authors.

**Table S2.** Summary of PM<sub>2.5</sub> levels in both homes. Source: Authors.

| Month     |      | Outdoor<br>( $\mu\text{g}/\text{m}^3$ ) | Bedroom -<br>Standard<br>( $\mu\text{g}/\text{m}^3$ ) | Kitchen -<br>Standard<br>( $\mu\text{g}/\text{m}^3$ ) | Living<br>room -<br>Standard<br>( $\mu\text{g}/\text{m}^3$ ) | Bedroom -<br>Passivhaus<br>( $\mu\text{g}/\text{m}^3$ ) | Kitchen -<br>Passivhaus<br>( $\mu\text{g}/\text{m}^3$ ) | Living<br>room -<br>Passivhaus<br>( $\mu\text{g}/\text{m}^3$ ) |
|-----------|------|-----------------------------------------|-------------------------------------------------------|-------------------------------------------------------|--------------------------------------------------------------|---------------------------------------------------------|---------------------------------------------------------|----------------------------------------------------------------|
| January   | Mean | 29.42                                   | 31.84                                                 | 28.50                                                 | 31.23                                                        | 15.75                                                   | 15.93                                                   | 15.42                                                          |
|           | N    | 8,928                                   | 8,928                                                 | 8,928                                                 | 8,928                                                        | 8,928                                                   | 8,928                                                   | 8,928                                                          |
|           | SD   | 14.19                                   | 24.26                                                 | 17.43                                                 | 24.18                                                        | 7.43                                                    | 7.54                                                    | 7.19                                                           |
| February  | Mean | 23.13                                   | 28.57                                                 | 24.33                                                 | 24.71                                                        | 13.50                                                   | 16.33                                                   | 16.15                                                          |
|           | N    | 8,064                                   | 8,064                                                 | 8,064                                                 | 8,064                                                        | 8,064                                                   | 8,064                                                   | 8,064                                                          |
|           | SD   | 11.79                                   | 30.06                                                 | 22.64                                                 | 15.19                                                        | 8.02                                                    | 8.89                                                    | 8.85                                                           |
| March     | Mean | 22.51                                   | 25.67                                                 | 21.84                                                 | 28.15                                                        | 16.38                                                   | 17.60                                                   | 19.72                                                          |
|           | N    | 8,928                                   | 8,928                                                 | 8,928                                                 | 8,928                                                        | 8,928                                                   | 8,928                                                   | 8,928                                                          |
|           | SD   | 10.82                                   | 11.30                                                 | 11.28                                                 | 10.03                                                        | 14.19                                                   | 15.20                                                   | 12.56                                                          |
| April     | Mean | 26.98                                   | 27.36                                                 | 27.65                                                 | 24.34                                                        | 18.16                                                   | 19.66                                                   | 18.15                                                          |
|           | N    | 8,628                                   | 8,628                                                 | 8,628                                                 | 8,628                                                        | 8,628                                                   | 8,628                                                   | 8,628                                                          |
|           | SD   | 12.42                                   | 11.63                                                 | 12.05                                                 | -                                                            | 10.40                                                   | 10.68                                                   | 9.42                                                           |
| May       | Mean | 34.01                                   | 43.71                                                 | 36.27                                                 | 34.27                                                        | 24.55                                                   | 27.85                                                   | 24.04                                                          |
|           | N    | 8,928                                   | 8,928                                                 | 8,928                                                 | 8,928                                                        | 8,928                                                   | 8,928                                                   | 8,928                                                          |
|           | SD   | 13.34                                   | 11.90                                                 | 17.22                                                 | 16.54                                                        | 11.40                                                   | 12.03                                                   | 11.31                                                          |
| June      | Mean | 22.21                                   | 26.82                                                 | 24.23                                                 | 24.86                                                        | 14.70                                                   | 15.71                                                   | 16.72                                                          |
|           | N    | 8,640                                   | 8,640                                                 | 8,640                                                 | 8,640                                                        | 8,640                                                   | 8,640                                                   | 8,640                                                          |
|           | SD   | 13.11                                   | 15.15                                                 | 7.07                                                  | 18.88                                                        | 9.41                                                    | 9.85                                                    | 10.74                                                          |
| July      | Mean | 19.47                                   | 25.32                                                 | 19.78                                                 | 23.62                                                        | 12.40                                                   | 13.53                                                   | 13.57                                                          |
|           | N    | 8,928                                   | 8,928                                                 | 8,928                                                 | 8,928                                                        | 8,928                                                   | 8,928                                                   | 8,928                                                          |
|           | SD   | 11.18                                   | 13.51                                                 | 13.50                                                 | 11.03                                                        | 9.07                                                    | 9.06                                                    | 2.35                                                           |
| August    | Mean | 17.33                                   | 30.25                                                 | 21.29                                                 | 27.08                                                        | 13.30                                                   | 14.32                                                   | 13.29                                                          |
|           | N    | 8,928                                   | 8,928                                                 | 8,928                                                 | 8,928                                                        | 8,928                                                   | 8,928                                                   | 8,928                                                          |
|           | SD   | 10.56                                   | 17.49                                                 | 17.99                                                 | 20.91                                                        | 2.63                                                    | 3.48                                                    | 3.16                                                           |
| September | Mean | 15.73                                   | 25.39                                                 | 26.68                                                 | 28.29                                                        | 11.34                                                   | 11.29                                                   | 10.37                                                          |
|           | N    | 8,640                                   | 8,640                                                 | 8,640                                                 | 8,640                                                        | 8,640                                                   | 8,640                                                   | 8,640                                                          |
|           | SD   | 9.58                                    | 16.83                                                 | 17.72                                                 | 16.44                                                        | 7.87                                                    | 7.48                                                    | 8.01                                                           |
| October   | Mean | 14.02                                   | 25.92                                                 | 25.33                                                 | 27.69                                                        | 15.55                                                   | 13.99                                                   | 16.09                                                          |
|           | N    | 8,940                                   | 8,940                                                 | 8,940                                                 | 8,940                                                        | 8,940                                                   | 8,940                                                   | 8,940                                                          |
|           | SD   | 9.25                                    | 17.41                                                 | 16.46                                                 | 13.94                                                        | 9.31                                                    | 11.02                                                   | 9.03                                                           |
| November  | Mean | 23.06                                   | 34.28                                                 | 32.66                                                 | 36.01                                                        | 21.13                                                   | 23.86                                                   | 23.00                                                          |
|           | N    | 8,640                                   | 8,640                                                 | 8,640                                                 | 8,640                                                        | 8,640                                                   | 8,640                                                   | 8,640                                                          |
|           | SD   | 15.31                                   | 22.43                                                 | 19.85                                                 | 21.37                                                        | 17.56                                                   | 20.24                                                   | 19.46                                                          |
| December  | Mean | 20.88                                   | 27.96                                                 | 24.08                                                 | 23.29                                                        | 13.19                                                   | 15.96                                                   | 16.40                                                          |
|           | N    | 8,928                                   | 8,928                                                 | 8,928                                                 | 8,928                                                        | 8,928                                                   | 8,928                                                   | 8,928                                                          |
|           | SD   | 12.74                                   | 17.12                                                 | 16.66                                                 | 17.06                                                        | 7.50                                                    | 9.15                                                    | 9.86                                                           |
| Total     | Mean | 22.39                                   | 29.44                                                 | 26.05                                                 | 27.82                                                        | 15.84                                                   | 17.17                                                   | 16.91                                                          |
|           | N    | 105,120                                 | 105,120                                               | 105,120                                               | 105,120                                                      | 105,120                                                 | 105,120                                                 | 105,120                                                        |
|           | SD   | 13.33                                   | 18.84                                                 | 16.90                                                 | 17.11                                                        | 10.85                                                   | 11.95                                                   | 10.84                                                          |

**Table S3.** Summary of tVOC levels in both homes. Source: Authors.

| Month     |      | Bedroom -<br>Standard<br>( $\mu\text{g}/\text{m}^3$ ) | Kitchen -<br>Standard<br>( $\mu\text{g}/\text{m}^3$ ) | Living room<br>- Standard<br>( $\mu\text{g}/\text{m}^3$ ) | Bedroom -<br>Passivhaus<br>( $\mu\text{g}/\text{m}^3$ ) | Kitchen -<br>Passivhaus<br>( $\mu\text{g}/\text{m}^3$ ) | Living room<br>- Passivhaus<br>( $\mu\text{g}/\text{m}^3$ ) |
|-----------|------|-------------------------------------------------------|-------------------------------------------------------|-----------------------------------------------------------|---------------------------------------------------------|---------------------------------------------------------|-------------------------------------------------------------|
| January   | Mean | 688.22                                                | 543.27                                                | 660.19                                                    | 564.52                                                  | 584.58                                                  | 574.37                                                      |
|           | N    | 8,928                                                 | 8,928                                                 | 8,928                                                     | 8,928                                                   | 8,928                                                   | 8,928                                                       |
|           | SD   | 380.31                                                | 309.70                                                | 474.98                                                    | 191.84                                                  | 176.73                                                  | 187.09                                                      |
| February  | Mean | 1,026.08                                              | 745.67                                                | 682.76                                                    | 763.33                                                  | 719.77                                                  | 737.56                                                      |
|           | N    | 8,064                                                 | 8,064                                                 | 8,064                                                     | 8,064                                                   | 8,064                                                   | 8,064                                                       |
|           | SD   | 518.33                                                | 349.75                                                | 430.92                                                    | 649.53                                                  | 483.64                                                  | 562.04                                                      |
| March     | Mean | 848.46                                                | 611.85                                                | 618.96                                                    | 848.12                                                  | 836.32                                                  | 812.92                                                      |
|           | N    | 8,928                                                 | 8,928                                                 | 8,928                                                     | 8,928                                                   | 8,928                                                   | 8,928                                                       |
|           | SD   | 434.68                                                | 296.58                                                | 288.58                                                    | 552.11                                                  | 468.31                                                  | 536.78                                                      |
| April     | Mean | 868.44                                                | 596.74                                                | 513.22                                                    | 340.97                                                  | 320.74                                                  | 333.51                                                      |
|           | N    | 8,628                                                 | 8,628                                                 | 8,628                                                     | 8,628                                                   | 8,628                                                   | 8,628                                                       |
|           | SD   | 496.41                                                | 309.72                                                | -                                                         | 147.21                                                  | 134.60                                                  | 152.97                                                      |
| May       | Mean | 1,720.68                                              | 1,173.23                                              | 1,340.99                                                  | 627.09                                                  | 609.21                                                  | 639.96                                                      |
|           | N    | 8,928                                                 | 8,928                                                 | 8,928                                                     | 8,928                                                   | 8,928                                                   | 8,928                                                       |
|           | SD   | 1,021.79                                              | 1,174.63                                              | 1,497.48                                                  | 454.91                                                  | 381.32                                                  | 507.22                                                      |
| June      | Mean | 672.97                                                | 923.49                                                | 515.31                                                    | 542.09                                                  | 545.63                                                  | 532.73                                                      |
|           | N    | 8,640.00                                              | 8,640.00                                              | 8,640.00                                                  | 8,640.00                                                | 8,640.00                                                | 8,640.00                                                    |
|           | SD   | 329.45                                                | 370.24                                                | 217.82                                                    | 313.01                                                  | 410.32                                                  | 366.26                                                      |
| July      | Mean | 846.31                                                | 546.27                                                | 548.51                                                    | 696.82                                                  | 774.00                                                  | 628.07                                                      |
|           | N    | 8,928                                                 | 8,928                                                 | 8,928                                                     | 8,928                                                   | 8,928                                                   | 8,928                                                       |
|           | SD   | 471.50                                                | 268.79                                                | 275.79                                                    | 349.64                                                  | 451.43                                                  | 287.49                                                      |
| August    | Mean | 632.33                                                | 458.28                                                | 452.86                                                    | 593.18                                                  | 581.59                                                  | 578.46                                                      |
|           | N    | 8,928                                                 | 8,928                                                 | 8,928                                                     | 8,928                                                   | 8,928                                                   | 8,928                                                       |
|           | SD   | 352.85                                                | 246.21                                                | 220.95                                                    | 189.37                                                  | 236.25                                                  | 176.74                                                      |
| September | Mean | 433.93                                                | 414.33                                                | 394.59                                                    | 395.01                                                  | 472.48                                                  | 565.71                                                      |
|           | N    | 8,640                                                 | 8,640                                                 | 8,640                                                     | 8,640                                                   | 8,640                                                   | 8,640                                                       |
|           | SD   | 215.98                                                | 199.84                                                | 157.09                                                    | 283.53                                                  | 290.68                                                  | 468.17                                                      |
| October   | Mean | 648.45                                                | 361.20                                                | 505.25                                                    | 454.02                                                  | 424.24                                                  | 462.71                                                      |
|           | N    | 8,940                                                 | 8,940                                                 | 8,940                                                     | 8,940                                                   | 8,940                                                   | 8,940                                                       |
|           | SD   | 358.21                                                | 203.83                                                | 217.58                                                    | 226.28                                                  | 206.11                                                  | 255.07                                                      |
| November  | Mean | 491.83                                                | 311.56                                                | 386.72                                                    | 507.69                                                  | 439.41                                                  | 570.52                                                      |
|           | N    | 8,640                                                 | 8,640                                                 | 8,640                                                     | 8,640                                                   | 8,640                                                   | 8,640                                                       |
|           | SD   | 277.79                                                | 139.24                                                | 191.54                                                    | 400.20                                                  | 257.43                                                  | 366.00                                                      |
| December  | Mean | 556.24                                                | 388.35                                                | 410.58                                                    | 498.96                                                  | 519.30                                                  | 510.16                                                      |
|           | N    | 8,928                                                 | 8,928                                                 | 8,928                                                     | 8,928                                                   | 8,928                                                   | 8,928                                                       |
|           | SD   | 249.96                                                | 182.35                                                | 201.04                                                    | 257.84                                                  | 270.26                                                  | 263.49                                                      |
| Total     | Mean | 786.02                                                | 588.52                                                | 586.49                                                    | 569.08                                                  | 569.07                                                  | 578.46                                                      |
|           | N    | 105,120                                               | 105,120                                               | 105,120                                                   | 105,120                                                 | 105,120                                                 | 105,120                                                     |
|           | SD   | 574.17                                                | 492.33                                                | 565.26                                                    | 389.72                                                  | 356.65                                                  | 384.35                                                      |

| Hour             |            | Bedroom |      |      |      |      |      |      |      |      |      |      |      |      |      |      |      |      |      |      |      |      |      |      | Hour |                  |           |
|------------------|------------|---------|------|------|------|------|------|------|------|------|------|------|------|------|------|------|------|------|------|------|------|------|------|------|------|------------------|-----------|
|                  |            | 0       | 1    | 2    | 3    | 4    | 5    | 6    | 7    | 8    | 9    | 10   | 11   | 12   | 13   | 14   | 15   | 16   | 17   | 18   | 19   | 20   | 21   | 22   |      | 23               |           |
| January          | Standard   | 867     | 899  | 866  | 879  | 824  | 780  | 763  | 796  | 805  | 732  | 671  | 537  | 430  | 366  | 357  | 389  | 443  | 544  | 657  | 710  | 790  | 780  | 802  | 830  | Standard         | January   |
|                  | Passivhaus | 579     | 582  | 593  | 603  | 616  | 620  | 640  | 657  | 653  | 646  | 599  | 529  | 503  | 491  | 472  | 458  | 463  | 486  | 502  | 553  | 594  | 580  | 560  | 575  | Passivhaus       |           |
| February         | Standard   | 1426    | 1423 | 1366 | 1319 | 1252 | 1209 | 1208 | 1242 | 1198 | 1111 | 928  | 707  | 591  | 522  | 530  | 593  | 648  | 713  | 882  | 1043 | 1089 | 1126 | 1209 | 1303 | Standard         | February  |
|                  | Passivhaus | 858     | 885  | 900  | 925  | 912  | 854  | 838  | 891  | 917  | 907  | 801  | 710  | 600  | 560  | 559  | 549  | 574  | 591  | 616  | 678  | 751  | 779  | 822  | 846  | Passivhaus       |           |
| March            | Standard   | 1058    | 1061 | 1083 | 1098 | 1057 | 1056 | 1040 | 1073 | 981  | 891  | 784  | 647  | 608  | 390  | 374  | 475  | 627  | 658  | 757  | 784  | 899  | 936  | 1013 | 1023 | Standard         | March     |
|                  | Passivhaus | 992     | 1041 | 1122 | 1124 | 1191 | 1258 | 1317 | 1336 | 1257 | 1093 | 816  | 683  | 522  | 459  | 433  | 481  | 510  | 540  | 561  | 617  | 666  | 721  | 796  | 897  | Passivhaus       |           |
| April            | Standard   | 1158    | 1146 | 1123 | 1090 | 1058 | 1078 | 1106 | 1094 | 1068 | 1035 | 871  | 742  | 596  | 499  | 424  | 423  | 506  | 587  | 698  | 774  | 832  | 877  | 1008 | 1072 | Standard         | April     |
|                  | Passivhaus | 346     | 362  | 387  | 401  | 415  | 428  | 440  | 451  | 453  | 448  | 405  | 341  | 296  | 267  | 258  | 251  | 261  | 250  | 244  | 255  | 274  | 299  | 321  | 334  | Passivhaus       |           |
| May              | Standard   | 2230    | 2246 | 2220 | 2178 | 2157 | 2207 | 2107 | 2180 | 1962 | 1778 | 1537 | 1275 | 1054 | 929  | 857  | 859  | 1020 | 1249 | 1431 | 1640 | 1872 | 2132 | 2076 | 2127 | Standard         | May       |
|                  | Passivhaus | 698     | 740  | 786  | 805  | 816  | 846  | 867  | 864  | 791  | 735  | 645  | 564  | 461  | 398  | 391  | 420  | 418  | 407  | 450  | 514  | 554  | 597  | 616  | 678  | Passivhaus       |           |
| June             | Standard   | 877     | 878  | 824  | 794  | 793  | 788  | 824  | 826  | 801  | 659  | 528  | 483  | 440  | 423  | 419  | 441  | 519  | 520  | 592  | 626  | 747  | 767  | 779  | 815  | Standard         | June      |
|                  | Passivhaus | 629     | 633  | 603  | 619  | 634  | 641  | 651  | 705  | 691  | 653  | 540  | 471  | 422  | 398  | 385  | 390  | 422  | 432  | 441  | 443  | 503  | 531  | 568  | 616  | Passivhaus       |           |
| July             | Standard   | 1042    | 1070 | 1076 | 1092 | 1064 | 1044 | 1048 | 1049 | 1019 | 864  | 729  | 592  | 542  | 525  | 451  | 527  | 584  | 643  | 680  | 757  | 900  | 960  | 966  | 1098 | Standard         | July      |
|                  | Passivhaus | 793     | 810  | 846  | 828  | 792  | 780  | 781  | 780  | 750  | 734  | 687  | 623  | 563  | 521  | 524  | 531  | 558  | 579  | 620  | 659  | 699  | 735  | 752  | 781  | Passivhaus       |           |
| August           | Standard   | 805     | 857  | 807  | 804  | 776  | 776  | 758  | 784  | 755  | 616  | 502  | 440  | 410  | 392  | 374  | 430  | 433  | 507  | 494  | 548  | 656  | 728  | 750  | 783  | Standard         | August    |
|                  | Passivhaus | 638     | 636  | 631  | 635  | 646  | 649  | 644  | 641  | 629  | 609  | 603  | 586  | 564  | 549  | 538  | 534  | 531  | 528  | 524  | 548  | 557  | 581  | 612  | 624  | Passivhaus       |           |
| September        | Standard   | 554     | 564  | 567  | 519  | 509  | 495  | 505  | 496  | 471  | 432  | 375  | 331  | 311  | 295  | 287  | 300  | 339  | 357  | 381  | 408  | 424  | 460  | 507  | 532  | Standard         | September |
|                  | Passivhaus | 451     | 456  | 458  | 488  | 510  | 497  | 525  | 528  | 441  | 396  | 343  | 320  | 296  | 288  | 271  | 273  | 299  | 316  | 337  | 371  | 375  | 385  | 429  | 429  | Passivhaus       |           |
| October          | Standard   | 888     | 821  | 800  | 801  | 795  | 791  | 793  | 810  | 712  | 666  | 561  | 457  | 422  | 396  | 398  | 415  | 423  | 489  | 518  | 571  | 679  | 711  | 803  | 837  | Standard         | October   |
|                  | Passivhaus | 545     | 598  | 613  | 597  | 567  | 566  | 540  | 529  | 542  | 522  | 497  | 455  | 407  | 347  | 308  | 273  | 277  | 294  | 309  | 363  | 398  | 411  | 447  | 492  | Passivhaus       |           |
| November         | Standard   | 625     | 655  | 635  | 619  | 606  | 573  | 604  | 588  | 489  | 437  | 364  | 305  | 273  | 264  | 291  | 343  | 456  | 477  | 452  | 477  | 518  | 555  | 594  | 605  | Standard         | November  |
|                  | Passivhaus | 637     | 659  | 692  | 676  | 655  | 644  | 663  | 630  | 551  | 514  | 469  | 420  | 381  | 357  | 349  | 355  | 368  | 384  | 374  | 395  | 426  | 468  | 539  | 583  | Passivhaus       |           |
| December         | Standard   | 640     | 646  | 654  | 647  | 642  | 626  | 625  | 628  | 593  | 542  | 494  | 467  | 452  | 439  | 431  | 437  | 455  | 487  | 534  | 549  | 577  | 580  | 593  | 616  | Standard         | December  |
|                  | Passivhaus | 641     | 614  | 619  | 603  | 592  | 615  | 604  | 614  | 566  | 497  | 438  | 362  | 314  | 300  | 297  | 305  | 346  | 383  | 440  | 494  | 534  | 571  | 589  | 642  | Passivhaus       |           |
| tVOC (ppb) scale |            | 125     | 169  | 213  | 256  | 300  | 405  | 511  | 616  | 721  | 826  | 932  | 1037 | 1142 | 1247 | 1353 | 1458 | 1563 | 1668 | 1774 | 1879 | 1984 | 2089 | 2195 | 2300 | tVOC (ppb) scale |           |

**Figure S3.** Hourly tVOC levels in the Passivhaus and Standard dwelling's bedrooms. Source: Authors.
